## **No evidence of functional co-adaptation between clustered microRNAs**

Antonio Marco\*

School of Biological Sciences, University of Essex, Colchester, United Kingdom

Running head: No co-adaptation between clustered microRNAs

\* To whom correspondence should be addressed

School of Biological Sciences

University of Essex

Wivenhoe Park, Colchester CO4 3SQ

United Kingdom

Email: [amarco.bio@gmail.com](mailto:amarco.bio@gmail.com)

Telephone: +44 (0) 120 687 3339

## **Abstract**

A significant fraction of microRNA loci are organized in genomic clusters. The origin and evolutionary dynamics of these clusters have been extensively studied, although different authors have come to different conclusions. In a recent paper, it has been suggested that microRNAs in the same clusters evolve to target overlapping sets of genes. The authors interpret this as functional co-adaptation between clustered microRNAs. Here I reanalyze their results and I show that the observed overlap is mostly due to two factors: similarity between two seed sequences of a pair of clustered microRNAs, and the expected high number of common targets between pairs of microRNAs that have a large number of targets each. After correcting for these factors, I observed that clustered microRNAs from different microRNA families do not share more targets than expected by chance. I also discuss how to investigate the evolutionary dynamics of clustered microRNAs and their targets. In conclusion, there is no evidence of functional co-adaptation between clustered microRNAs.

**Keywords:** MiRNAs, convergent evolution, targets, drift-draft

MicroRNAs are often clustered in the genome (Marco, Ninova, and Griffiths-Jones 2013). Whether these clusters have emerged by fusion of existing microRNAs, by tandem duplication, or by *de novo* emergence of new microRNAs near existing ones is still under debate, although a majority of clusters seem to have been originated after the emergence of a new microRNA next to an existing microRNA (Marco, Ninova, Ronshaugen, et al. 2013; Mohammed et al. 2013; Mohammed et al. 2014). In a recent paper, Wang et al. (2016) proposed that clustered microRNAs evolve to coordinately regulate functionally related genes. In their ‘functional co-adaptation’ model, microRNAs in a cluster are primarily under positive selection. Their model is an alternative to the ‘drift-draft’ model, which suggest that the evolution of microRNA clusters is influenced by tight genetic linkage, and largely non-adaptive (Marco, Ninova, Ronshaugen, et al. 2013; Marco, Ninova, and Griffiths-Jones 2013). The ‘drift-draft’ model is based on the observation that a majority of microRNA clusters are formed during evolution by the random emergence of novel microRNAs near existing microRNA genes in the genome. Although functional co-adaptation may explain some observed patterns in specific microRNA clusters (see for instance (Chawla et al. 2016)), the evidence presented so far does not indicate that this is a widespread phenomenon. Here I show that the results presented by Wang et al (2016) do not support the conclusion that clustered microRNAs target overlapping sets of genes more than expected by chance, and therefore, there is no evidence of functional co-adaptation of clustered microRNAs.

In their paper, Wang et al (2016) first describe some evidence against the ‘drift-draft’ model. They expect that, if this model is correct, a higher fraction of microRNAs in introns should be conserved due to linkage effects. However, this is not a valid prediction: the ‘drift-draft’ model predicts that loss of microRNAs is reduced due to linkage, but also that the rate of *de novo* formation is increased (Marco, Ninova, Ronshaugen, et al. 2013). Therefore, one would expect both conserved and non-conserved (novel) microRNAs in introns. In other words, the different ratio of

conserved/non-conserved microRNAs in introns with respect to intergeneric regions does not refute the ‘drift-draft’ model.

Wang et al. (2016) reported that 1751 genes were targeted by at least two members of the same microRNA cluster. Reproducing their methodology (see Materials and Methods) I detected 1,963 genes targeted by two or more microRNAs from the same cluster. Both estimates are very similar and the small differences may be due to slightly different parsing criteria. By performing a permutation analysis I found that this number is larger than expected by chance (10,000 permutations,  $p=0.0359$ , Figure 1A). However, a closer inspection to the results reveal that a large fraction of the common targets are attributed to only one cluster (*mir-183~182*, 814 out of the 1,963 targets, ~42%), and that only 15 clusters had common targets between conserved microRNAs from different families, 5 of which were listed more than once, although the target count not added to the final number (Supplementary File 1). When we removed the *mir-183~182* cluster from the analysis, the number of genes targeted by at least two clustered microRNAs ( $n=1,149$ ) is not significantly different to random expectations ( $p=0.2760$ , Figure 1A). Similarly, the number of genes targeted by three or more clustered microRNAs (129) was not significantly high ( $p=0.3718$ ). In conclusion, the apparent overlap among the targets of clustered microRNAs is due to only one cluster: *mir-183~182*.

Why does this cluster have a large number of overlapping targets? The *mir-183~182* cluster host three microRNA families with targets, yet the majority of the common targets reported (789) are found between two microRNA families: miR-183-5p and mir-96-5p/1271-5p. Both families have very similar seed sequences (AUGGCAC and UUGGCAC), which differ in only the first nucleotide. Similar seeds are more likely to have overlapping sets of targets randomly. In fact, when two microRNA families share 6 out of the 7 nucleotides that define the seed sequence, the number

of common targets is significantly high (Figure 1B). When binning the data into pairs of microRNAs that are found clustered and those unclustered, accounting for those pairs of families with 6 common nucleotides, we observed that the differences between clustered and non-clustered microRNAs are not significant (Figure 1C). In conclusion, the observed overlap between targets in some clustered microRNAs is actually the random consequence of the similarity between their seed sequences, and is not associated to whether the microRNAs are clustered or not. Interestingly, mir-183 and mir-96 have similar seed sequences but they are probably not paralogs. One possibility that directional selection have change the seed sequences of one (or both) microRNAs during evolution. However, both seed sequences have been conserved since their origin (Supplementary Figure 1A) and, therefore, there is no evidence of substitutions happening in the seed of these microRNAs for the last 600 million years.

From these results it is also evident that clusters sharing a large number of targets are those whose individual microRNAs target a large number of transcripts. This is expected from a probabilistic point of view since, the more targets two microRNAs have, the more the chances that some of them will be shared. In Figure 1D I plot the number of overlapping targets as a function of the harmonic mean of the number of targets of each microRNA in a pair. A few outliers to a near perfect correlation correspond to microRNA family pairs with similar seed sequences (red circles). There is not a clear difference between clustered and non-clustered microRNAs (Figure 1D).

Early reviews speculated that clustered microRNAs may target common genes (Bartel 2004; Kim and Nam 2006). Indeed, the pioneering analysis by (Grün et al. 2005) showed evidence that, in *Drosophila*, some clustered microRNAs tend to have common targets. However, this observation is not statistically significant ( $p=0.2569$ ). Some specific cases have been suggested: non-paralogous microRNAs in the mir-106b~25 cluster have a few CDK inhibitors as common targets (Kim et al.

2009); four microRNAs from the mir-379~410 cluster may target the gene PUM2 during dendrite differentiation (Fiore et al. 2009); and members of the miR-23a~24-2 cluster have common targets (Chhabra et al. 2010). In all these examples, microRNAs are highly conserved and show no nucleotide differences in their seed regions in all studied species (Supplementary Figure 1B-D). This indicates that changes in the microRNA-mRNA regulatory networks happens mostly at the level of target sites rather than in microRNAs loci. Therefore, these examples do not support the functional co-adaptation model.

Wang et al. (2016) also claim that microRNAs in clusters may be involved in common biological pathways. In the pathway enrichment analysis (in their supplementary Table S9), a large majority of processes enriched for target sites of clustered microRNAs correspond to sites from the mir-183~182 cluster or other clusters with similar seed sequences among their members. After removing these clusters the pathway enrichment is explained by two seed families from the cluster mir-17~92a: miR-17-5p/20-5p/93-5p/106-5p/519-3p and miR-19-3p. As with the other examples discussed so far, the seed sequences of miR-17-5p and miR-19a-3p are highly conserved (accession numbers MIPF0000001 and MIPF0000011 in <http://mirbase.org>). This further support that changes in target sites, rather than in microRNA loci, may explain the observed functional overlap between the targets of clustered microRNAs.

How microRNA clusters emerge is a relatively known mechanism where discrepancies between authors are mostly around specific details (Marco, Ninova, Ronshaugen, et al. 2013; Mohammed et al. 2013; Mohammed et al. 2014). However, the impact of clustered microRNAs in the evolution of target sites is a largely unexplored research area. Perhaps is time now to focus more on the targets, rather than in the the microRNAs, to understand why functionally related genes are sometimes targeted by clustered microRNAs. In summary, the model proposed by Wang et al. (2016) is an

interesting hypothesis that provides a mechanistic explanation to microRNA clusters. Indeed, their functional co-adaptation model may be tested as new datasets and/or methodological frameworks become available. However, under the current available data, there is no statistical evidence that clustered microRNAs have evolved to target common genes, and microRNAs targeting functionally related genes do not show evidence of adaptation. In conclusion, there is no evidence of functional co-adaptation between clustered microRNAs.

## Materials and Methods

The datasets and protocols to predict microRNA targets were as described in Wang et al. (2016). Target predictions and microRNA families were downloaded from TargetScanHuman, release 7.1 (Agarwal et al. 2015). The cutoff to select target in human genes was  $P_{ct} \geq 0.5$  and the microRNA families were classified in two groups: conserved among animals and broadly conserved among vertebrates. MicroRNA expression data was extracted from miRBase release 21 (Kozomara and Griffiths-Jones 2014) for the experimental data from Meunier et al. (Meunier et al. 2013). Only microRNAs with 50 or more reads were further considered. Transcript expression data was obtained from Brawand et al (2011). Only co-expressed microRNA-target pairs were analyzed. Two microRNAs were considered to be in the same clusters if they were less than 10000 nucleotides apart from each other in the human genome GRCh38, as indexed in miRBase. Pairs of microRNA families coming from the same precursor were not taken into account (which may, in some cases, target overlapping sets of transcripts [Marco et al. 2012]). Overlapping microRNA clusters were not considered in the final counts, but they are listed in the supplementary files. For the permutation analysis, only the location of the microRNAs was permuted, keeping the structure of the clusters; the common targets were counted in 10,000 independent random replicates. Seed sequence similarity is defined as the longest common substring. MicroRNA targets from PicTar were

retrieved from UCSC Table Browser (Genome: dm2; table: picTarMiRNAS1), *Drosophila* microRNA clusters are those described by Grün et al. (2005), and the statistical significance was assessed by randomly permuting the microRNA loci across clusters (10,000 replicates). All analysis performed can be reproduced by running a collection of scripts provided in a UNIX operating system (<https://doi.org/10.6084/m9.figshare.6165722>).

## Acknowledgements

This work was supported by the Wellcome Trust [grant number 200585/Z/16/Z].

## References

- Agarwal V, Bell GW, Nam J-W, Bartel DP. 2015. Predicting effective microRNA target sites in mammalian mRNAs. *eLife* 4.
- Bartel DP. 2004. MicroRNAs: genomics, biogenesis, mechanism, and function. *Cell* 116:281–297.
- Brawand D, Soumillon M, Necsulea A, Julien P, Csardi G, Harrigan P, Weier M, Liechti A, Aximu-Petri A, Kircher M, et al. 2011. The evolution of gene expression levels in mammalian organs. *Nature* 478:343–348.
- Chawla G, Deosthale P, Childress S, Wu Y, Sokol NS. 2016. A let-7-to-miR-125 MicroRNA Switch Regulates Neuronal Integrity and Lifespan in *Drosophila*. *PLOS Genet.* 12:e1006247.
- Chhabra R, Dubey R, Saini N. 2010. Cooperative and individualistic functions of the microRNAs in the miR-23a~27a~24-2 cluster and its implication in human diseases. *Mol. Cancer* 9:232.
- Fiore R, Khudayberdiev S, Christensen M, Siegel G, Flavell SW, Kim T-K, Greenberg ME, Schrott G. 2009. Mef2-mediated transcription of the miR379–410 cluster regulates activity-dependent dendritogenesis by fine-tuning Pumilio2 protein levels. *EMBO J.* 28:697–710.
- Grün D, Wang Y-L, Langenberger D, Gunsalus KC, Rajewsky N. 2005. microRNA Target Predictions across Seven *Drosophila* Species and Comparison to Mammalian Targets. *PLOS Comput. Biol.* 1:e13.
- Kim VN, Nam J-W. 2006. Genomics of microRNA. *Trends Genet.* TIG 22:165–173.
- Kim Y-K, Yu J, Han TS, Park S-Y, Namkoong B, Kim DH, Hur K, Yoo M-W, Lee H-J, Yang H-K, et al. 2009. Functional links between clustered microRNAs: suppression of cell-cycle inhibitors by microRNA clusters in gastric cancer. *Nucleic Acids Res.* [Internet]. Available from: <http://dx.doi.org/10.1093/nar/gkp002>



- Kozomara A, Griffiths-Jones S. 2014. miRBase: annotating high confidence microRNAs using deep sequencing data. *Nucleic Acids Res.* 42:D68-73.
- Marco A, MacPherson JI, Ronshaugen M, Griffiths-Jones S. 2012. MicroRNAs from the same precursor have different targeting properties. *Silence* 3:8.
- Marco A, Ninova M, Griffiths-Jones S. 2013. Multiple products from microRNA transcripts. *Biochem. Soc. Trans.* 41:850–854.
- Marco A, Ninova M, Ronshaugen M, Griffiths-Jones S. 2013. Clusters of microRNAs emerge by new hairpins in existing transcripts. *Nucleic Acids Res.* 41:7745–7752.
- Meunier J, Lemoine F, Soumillon M, Liechti A, Weier M, Guschanski K, Hu H, Khaitovich P, Kaessmann H. 2013. Birth and expression evolution of mammalian microRNA genes. *Genome Res.* 23:34–45.
- Mohammed J, Bortolamiol-Becet D, Flynt AS, Gronau I, Siepel A, Lai EC. 2014. Adaptive evolution of testis-specific, recently evolved, clustered miRNAs in *Drosophila*. *RNA N. Y.* N 20:1195–1209.
- Mohammed J, Flynt AS, Siepel A, Lai EC. 2013. The impact of age, biogenesis, and genomic clustering on *Drosophila* microRNA evolution. *RNA N. Y.* N 19:1295–1308.
- Wang Y, Luo J, Zhang H, Lu J. 2016. microRNAs in the Same Clusters Evolve to Coordinately Regulate Functionally Related Genes. *Mol. Biol. Evol.* 33:2232–2247.

## Figure Legends

**Figure 1. Common targets between clustered and non-clustered microRNAs.** (A) Permutation analysis of common targets between clustered microRNAs. Each of the 10,000 permutations reported the number of common targets between at least two microRNAs from the same cluster. The observed values for all clusters, and for all but one outlier (*mir-183~182*) are indicated with vertical dashed lines. (B) Fraction of common targets (common targets divided the minimum number of individual targets) for all microRNAs in this study, binned by the seed sequence similarity. (C) Fraction of common targets for clustered and non-clustered pairs of microRNAs, for those with a seed similarity less than 6 (left panel) or 6 (right panel). (D) Number of common targets between pairs of microRNAs versus the harmonic mean of the individual number of targets for the pair. Filled circles represent clustered microRNAs, gray circles are unclustered microRNAs, and red circles are pairs of microRNAs with a seed similarity of 6.

**A**

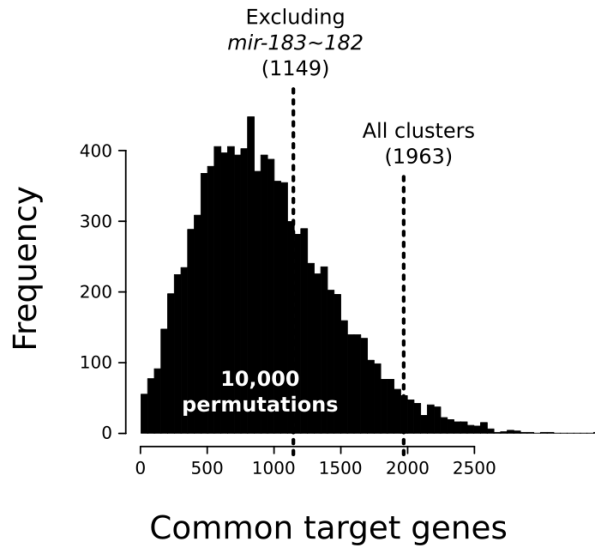

**B**

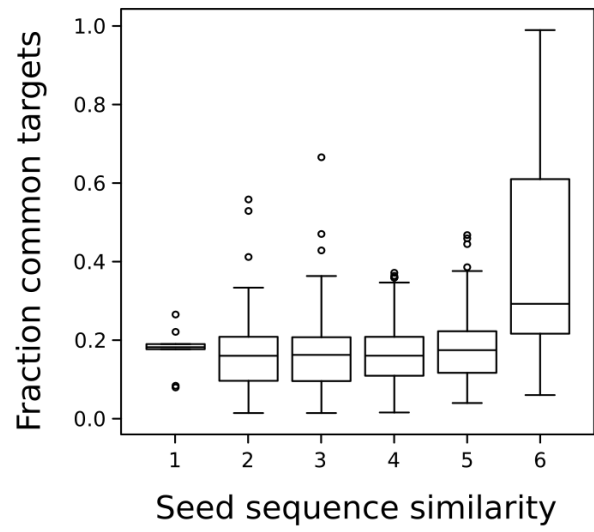

**C**

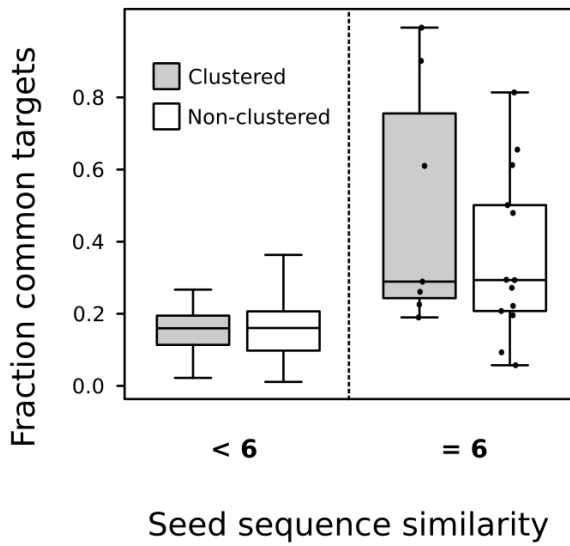

**D**

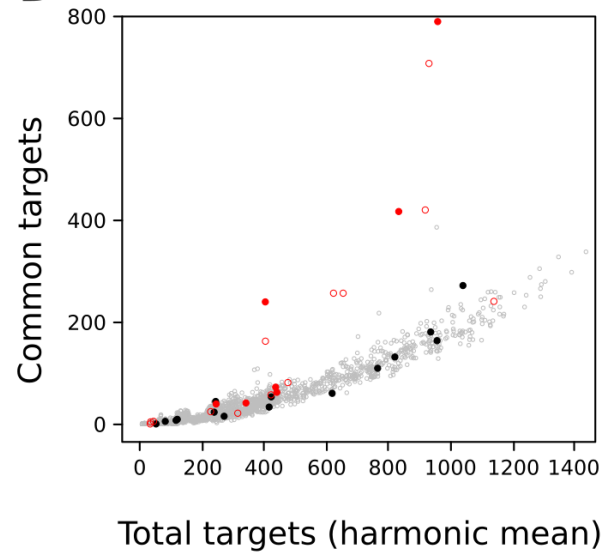

Source: https://www.biorxiv.org/content/10.1101/274811v1.full.pdf
