# Supplementary material for: No evidence of functional co-adaptation between clustered microRNAs
Source: bioRxiv or medRxiv preprint supplement (doi:10.1101/274811), 2019-07-29

**Supplementary Figure 1. Seed sequence conservation in clustered microRNA families.**

Sequences were downloaded from miRBase (<http://mirbase.org>). Red areas indicate the seed region of the mature sequence. Alignments represent mature sequences with a reported common target from the cluster: A) mir-183~182; B) mir-106b~25; C) miR-23a~24-2; D) mir-379~410. Species code as defined in miRBase.

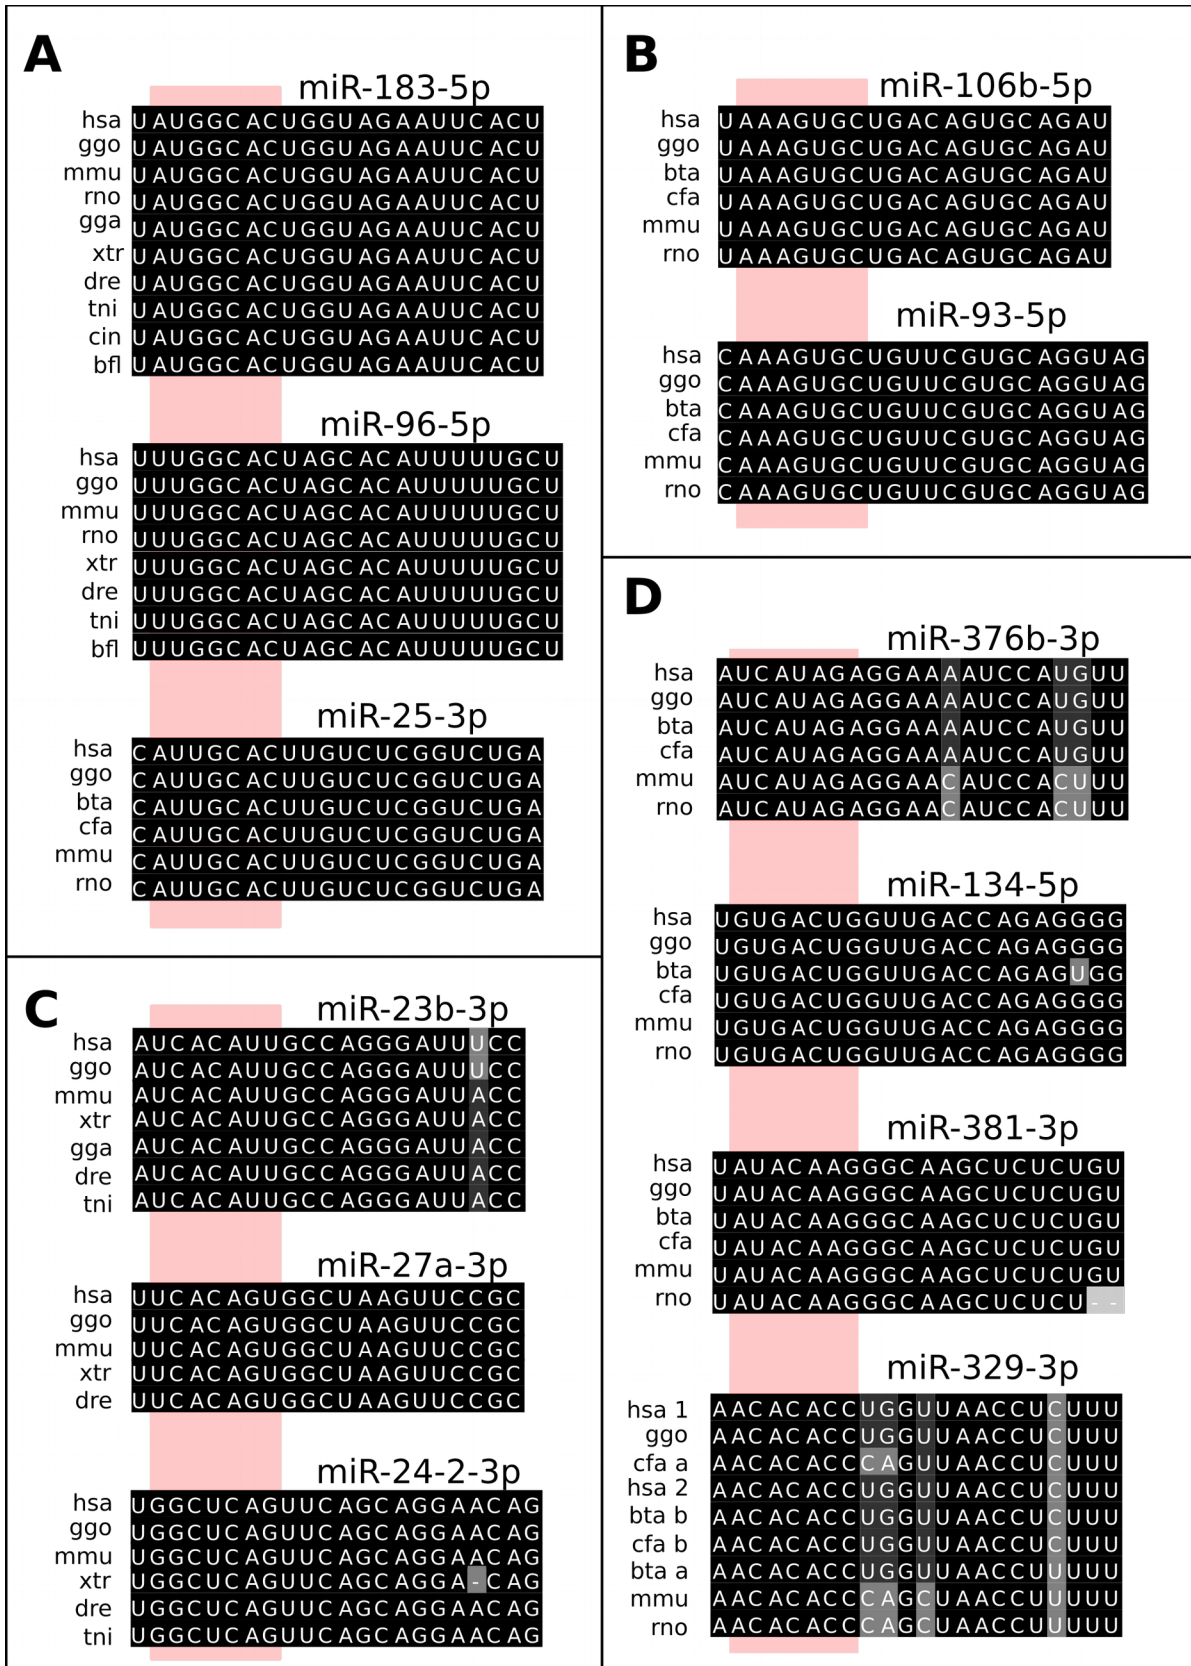

Supplement: Supplementary file [file 274811-1.pdf]
